# Supplementary material for: Role of MIL-53(Fe)/hydrated–dehydrated MOF catalyst for electrochemical hydrogen evolution reaction (HER) in alkaline medium and photocatalysis
Source: Royal Society of Chemistry journal article supplement (doi:10.1039/c8ra08208a), 2019-01-01
Supplement: c8ra08208a1.pdf [file c8ra08208a1.pdf]

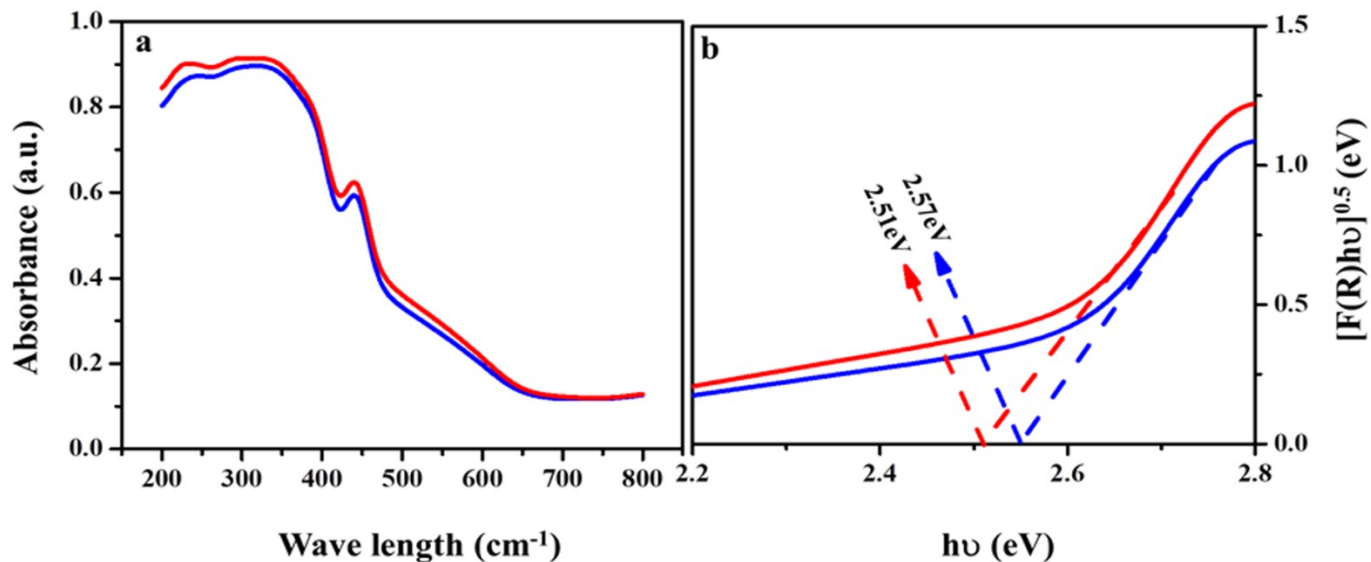

Figure: S1 (a, b) UV spectrum of (a) MIL-53(Fe)- hydrated and (b) MIL-53(Fe)- dehydrated , (Right side) Kubelka-Munk plot illustrating the band gap energy for MIL-53(Fe)- hydrated and (b) MIL-53(Fe)-dehydrated.

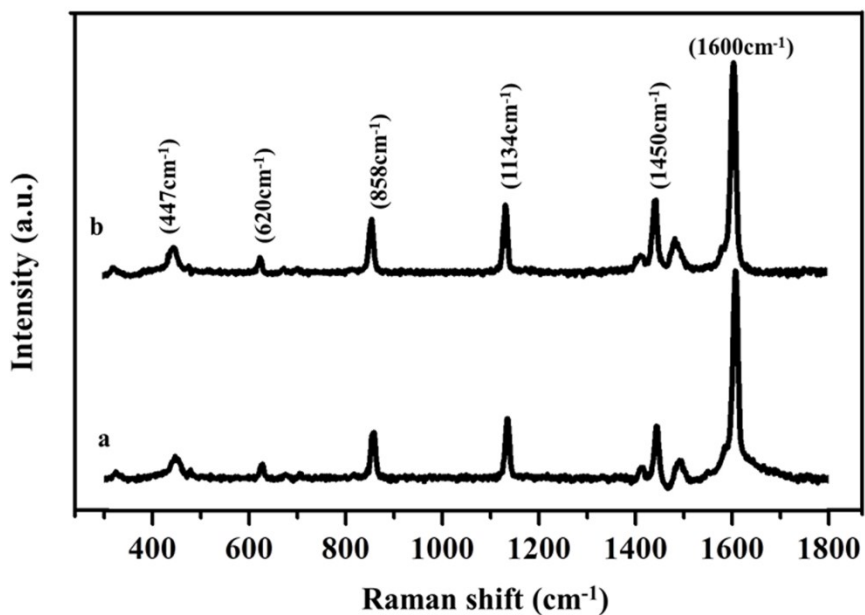

Figure: S2 (a, b) Raman spectra of (a) MIL-53(Fe)- hydrated and (b) MIL-53(Fe)- dehydrated

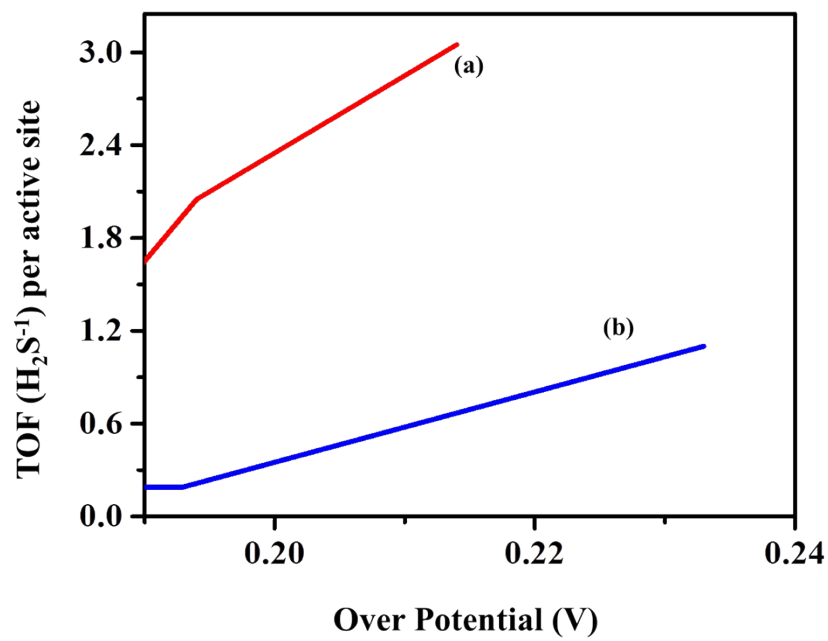

Figure : S3 Turn over frequency of MIL-53(Fe) -hydrated and dehydrated catalyst
